---

# Erratum

Kelley DE, Bray GA, Pi-Sunyer FX, Klein S, Hill J, Miles J, Hollander P: Clinical efficacy of orlistat therapy in overweight and obese patients with insulin-treated type 2 diabetes: a 1-year randomized controlled trial. *Diabetes Care* 25:1033–1041, 2002

On page 1033 of the above-listed article, the first sentence in the RESULTS section of the abstract should read as follows:

After 1 year, the orlistat group lost significantly more weight ( $-3.89 \pm 0.3$  kg of baseline body weight, means  $\pm$  SE) than the placebo group ( $-1.27 \pm 0.3$  kg,  $P < 0.001$ ).
